# Supplementary material
Source: PubMed Central journal article supplement (PMC5126972)
Supplement: NIHMS606738-supplement-01.pdf [file NIHMS606738-supplement-01.pdf]

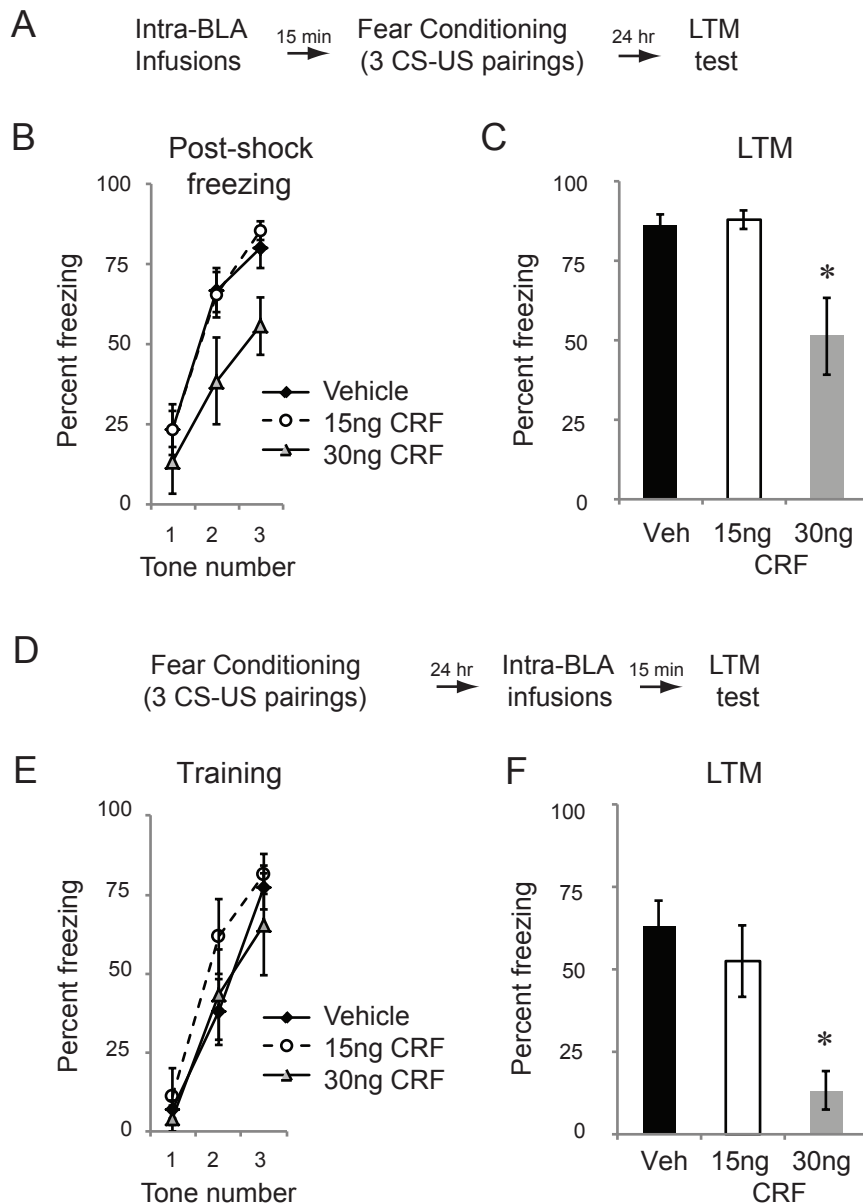

Supplementary Figure 1: A low concentration of CRF does not affect fear conditioning, while a higher dose impairs post-shock freezing, long-term memory (LTM) and fear expression. **A:** Schematic of behavior protocol. **B:** Mean  $\pm$  SE % post-shock freezing after three conditioning trials in animals given intra-BLA infusions of saline vehicle ( $n=12$ ), 15 ng CRF ( $n=8$ ) or 30 ng CRF ( $n=7$ ) 15 min prior to training. A repeated-measures ANOVA revealed a main effect of group ( $p < 0.05$ ) and Tukey's *post hoc t* tests revealed significant differences between vehicle and high-dose CRF animals ( $p < 0.05$ ). **C:** Mean  $\pm$  SE % freezing to the CS tone 24 hr after training. Rats previously receiving a high dose of CRF showed impaired freezing to the CS tone ( $p < 0.005$ ). **D:** Schematic of behavior protocol. **E:** Mean  $\pm$  SE % freezing to three conditioning trials. **F:** Mean  $\pm$  SE % freezing to the CS tone 24 hr after training and 15 min after infusion of saline vehicle ( $n=11$ ), 15 ng CRF ( $n=8$ ) or 30 ng CRF ( $n=5$ ). A one-way ANOVA revealed a main effect of group ( $p < 0.01$ ) and Tukey's *post hoc t* tests revealed a significant difference between vehicle and high-dose animals ( $p < 0.01$ ) and low- and high-dose animals ( $p < 0.05$ ).
